# Supplementary material for: Identifying trends in nursing start-ups using text mining of YouTube content
Source: PLoS One. 2020 Feb 13;15(2):e0226329. doi: 10.1371/journal.pone.0226329 (PMC7018134; doi:10.1371/journal.pone.0226329)
Supplement: S1 File — (XLSX) [file pone.0226329.s001.xlsx]

## Sheet: Sheet1
no	title	site
1	Nursing Entrepreneurship & Tracy McClelland	https://youtu.be/3ckeFDUQd-I
2	Grow as a Nurse Entrepreneur at the National Nurses in Business Conference	https://youtu.be/yLbHG4JrikM
3	Nurse Entrepreneur-Reyna Talks about Tracy's Training	https://youtu.be/zaliBjxoBpA
4	It's What You Say-Nurse Entrepreneur Motivation	https://youtu.be/FbnSz2i20Vg
5	Nurse Entrepreneur Celebration with Dr. Tracy McClelland	https://youtu.be/WwR3ZlMbGUY
6	Nursing Entrepreneur Training with Tracy	https://youtu.be/XXbI2tkVpk4
7	25 Ideas for Nurse Entrepreneurship	https://youtu.be/VjZ-bAPLKlE
8	Why I became a Nurse Entrepreneur	https://youtu.be/wRtcQIdLs9U
9	Nursing Entrepreneur Career	https://youtu.be/rEk1ubEaZ9g
10	Traction - entrepreneurship	https://youtu.be/7pa030aXSd4
11	Nurse Entrepreneur Thanks for Registering	https://youtu.be/MwvFl6NQwHM
12	A former Nurse Turned Entrepreneur.	https://youtu.be/vh6b34IQy1o
13	25 Reasons To Become A Nursing Entrepreneur Free Book Offer	https://youtu.be/WF_ZSd9ZSLo
14	A healthy mind for the Nurse Entrepreneur	https://youtu.be/VkQThJMi1o4
15	How To Become A Nurse Entrepreneur	https://youtu.be/msbPrdkc3BM
16	Episode 11: From a Nurse to a Media Entrepreneur with 4 Successful brands, How did she do it?	https://youtu.be/bDXcPcU2K_U
17	From Nurse to Entrepreneur - Channel Intro Video	https://youtu.be/J5Ep53bsunY
18	Are you a Nurse Entrepreneur or Intrepreneur	https://youtu.be/USbsNtAcEwo
19	Becoming a Nursing Entrepreneur	https://youtu.be/Jaikzpbpkq8
20	Nursing Entrepreneur Opportunities by Tonia Chisolm	https://youtu.be/26NY0RGcxb0
21	Nursing Entrepreneur Shares Her Story	https://youtu.be/gfjzf4BLr84
22	Meet Denise Nurse: lawyer, entrepreneur, TV presenter	https://youtu.be/ulGwA0kGkE4
23	Nursing Entrepreneur Annual Conference	https://youtu.be/GXzAVI1am-A
24	Nurse Entrepreneur Training Video #3 Marketing	https://youtu.be/acKCgLhiq5Y
25	Nurse Entrepreneur Training Video # 2 Getting Started	https://youtu.be/bukoUUxpLMc
26	Registered Nurse to Entrepreneur	https://youtu.be/pY4P0iKoWLQ
27	Want to be a Nurse Entrepreneur?	https://youtu.be/dA6y_CWh4ZE
28	What is Nurse Entrepreneurship	https://youtu.be/-EpIy2HTPjs
29	Monetizing Your Nursing Experience	https://youtu.be/x52lLd-XXfY
30	Randi Kontni & Hanne Duedahl - Development of an entrepreneurial nursing	https://youtu.be/keEjuJsSvik
31	Fast Track to Nursing Entrepreneur Success!	https://youtu.be/Pn8AC03yk6c
32	Tracy McClelland's -25 Reasons to Become a Nursing Entrepreneur	https://youtu.be/rc-GrkWAN00
33	NEW IDEA BUSINESS IDEAS FOR NURSES AND DOCTORS BUSINESS IDEA	https://youtu.be/TMZ1t3Zous8
34	Ellen Bye Jensen - Development of an Entrepreneurial Elective Nursing Module 13	https://youtu.be/Eb9boXAlV0g
35	Legal Nurse Consulting tips: Entrepreneur State of Mind	https://youtu.be/vYkYY2FlIq8
36	Legal Nurse Consulting tips: Entrepreneur State of Mind	https://youtu.be/xp8sjj5CfA8
37	Podcasting For Entrepreneurial Nurses	https://youtu.be/xF8wNEiKojQ
38	Nurse Entrepreneur-Tracy McClelland Presents	https://youtu.be/lvBhe9J-zQ4
39	Business Ideas For Nurse Entrepreneurs	https://youtu.be/K3tZIA-Ufvo
40	Nurse Entrepreneur	https://youtu.be/9FWh18ZCwf8
41	Entrepreneurial Nursing Opportunities A Paradigm Shift For Nurses	https://youtu.be/eJyaZ3qaqw4
42	Entrepreneurial Nursing Opportunities-A Paradigm Shift For Nurses	https://youtu.be/ntcTdd9bw7A
43	Holistic Nurse Entrepreneur - Advantages of Being a Nurse	https://youtu.be/hASCSU54mxk
44	Nurse Entrepreneurs Rake in Extra Money In The Next 10 Days	https://youtu.be/ji2wj8Ja9fk
45	DSDomination Live Interview on How To Retire A Tired Nurse Dominating Entrepreneurs	https://youtu.be/NU8K8KOtJ9A
46	Tracy McClelland's Nursing Entrepreneur Success in 2014	https://youtu.be/4Oj6M4Au8ac
47	Tracy McClelland ' s Nurse Entrepreneurs	https://youtu.be/JJe2dCZyo0k
48	Nursing Q&A: Vickie Milazzo Legal Nurse Consulting	https://youtu.be/x5wKd5xOWRs
49	Episode 103 StaciJoy, Holistic Nurse Entrepreneur	https://youtu.be/XuLEE2e5_OQ
50	Nursing Entrepreneur Certification	https://youtu.be/Tr_zFV5bEFQ
51	Business Talk - Brent Smith, Registered Nurse and Business Entrepreneur	https://youtu.be/gdQdZisyCRY
52	Nurse Entrepreneurs - How to use Fiverr -Cesar Delgadillo	https://youtu.be/jqw4V3XziZo
53	Nurse Entrepreneur Opportunities	https://youtu.be/oPTHEJHHIko
54	Nurse Entrepreneur	https://youtu.be/q3rncVFdpWU
55	Nurse Entrepreneur (3K/Day Nurse)	https://youtu.be/uuJ-dyvocfw
56	Career Corner #35 - Entrepreneurship and Nursing	https://youtu.be/jpKMmG9vb2M
57	Holistic Entrepreneur Coaching	https://youtu.be/yBxp5Mgea_s
58	2013 NDC Entrepreneur Awards: Foundations Health Career Academy	https://youtu.be/gV_znyHwP4o
59	Nursing Entrepreneur	https://youtu.be/RU_hBFAVomc
60	Nurse entrepreneur ideas | entrepreneur ideas | entrepreneur business ideas | ideas entrepreneur	https://youtu.be/69wu6y_-hCI
61	Nurse Entrepreneur gives Genuine Love and Concern	https://youtu.be/7NDP986h2uk
62	RN Is Open to New Opportunities for Nursing Entrepreneurship	https://youtu.be/UPXChSedFPk
63	Entrepreneurship for Nurses Intro	https://youtu.be/ulKGyxlc90I
64	Nursing Entrepreneur Mastery	https://youtu.be/9eGA6_QTbNs
65	The Growing Demand For Nurse Entrepreneurship	https://youtu.be/LIUZa4aUTWA
66	Nursing Entrepreneurs at the National HTC Conference	https://youtu.be/pnAJNISGnHY
67	Nursing Entrepreneur Nursing Success System	https://youtu.be/caKd-rnrqNk
68	Tracy McClelland creating Nursing Entrepreneurs	https://youtu.be/tPB2FWyGVI4
69	Entrepreneurial spirit, technology shaping the future of nursing	https://youtu.be/Kd2z4C1C2G8
70	Nursing Entrepreneur Having Power through Persistence	https://youtu.be/bcIfCeg8ckg
71	Tracy McClelland's HTC Nurse Entrepreneur Apprenticeship for Nurses	https://youtu.be/_2JnqT1dBxE
72	Nurse Entrepreneur- Building Health Career Centers (3)	https://youtu.be/FUbpT1a8gH0
73	Interview with James DeMaria, BSN--VP of Renal Care Registered Nursing Services	https://youtu.be/BQe2yp1e8qs
74	Nursing Entrepreneurs Tracy M. McClelland RN, MSN	https://youtu.be/CM5AZz-1_YQ
75	James Malinchak endorses Tracy McClelland Nursing Entrepreneur	https://youtu.be/tnJKkSqToks
76	Tracy M. McClelland Nursing Entrepreneur	https://youtu.be/oj1JlfIsEeY
77	Nursing Entrepreneur Tracy McClelland RN, MSN	https://youtu.be/ZQJqjBxbg6I
78	Tracy M. McClelland Nursing Entrepreneur	https://youtu.be/ZydmJcdMbDE
79	Nursing Entrepreneur	https://youtu.be/lOllg2WdBhk
80	Nursing Entrepreneurs	https://youtu.be/2o6JqLG2YOU
81	MSN in Innovation & Intra/Entrepreneurship in Advanced Nursing Practice	https://youtu.be/GcqZB2g35UI
82	Nurse Entrepreneur (Nursepreneur) Movie	https://youtu.be/KG6Xu3YEpXc
83	Nurse Entrepreneur	https://youtu.be/ZxuwVqyyrmM
84	Nurse Entrepreneur	https://youtu.be/eibAaYkoHp0
85	University of Rochester School of Nursing discusses Entrepre	https://youtu.be/35KlNHdk4pU
	32 of 85 video clips are used for analysis (53 are not suitable for advertising, nursing startup, or English subtitles are not provided and excluded from analysis)
